# Supplementary material
Source: Research Square preprint supplement (doi:10.21203/rs.3.rs-9080774/v1)
Supplement: Supplementary file 1 [file 54c1b01c63d2056a510d1094.docx]

**Supplementary Information**

**Prediction And Investigation of Transition Metal Oxides for Hydrogen Storage Application via Machine Learning-Assisted Density Functional Theory**

Romel Mark B. Irabon1,3, Rustom R. Hibone3, Francis Kirby B. Burnea2,3, Giovanni J. Paylaga1,3, Leo Cristobal C. Ambolode II1,3

*1Department of Physics, Mindanao State University – Iligan Institute of Technology, A. Bonifacio Avenue, Tibanga, 9200 Iligan City, Philippines*

*2Department of Chemistry, Mindanao State University – Iligan Institute of Technology, A. Bonifacio Avenue, Tibanga, 9200 Iligan City, Philippines*

*3Center for Nanoscience Research, Premiere Research Institute of Science and Mathematics (PRISM), Mindanao State University – Iligan Institute of Technology, A. Bonifacio Avenue, Tibanga, 9200 Iligan City, Philippines*

*Email:* [*romelmark.irabon@g.msuiit.edu.ph*](mailto:romelmark.irabon@g.msuiit.edu.ph)


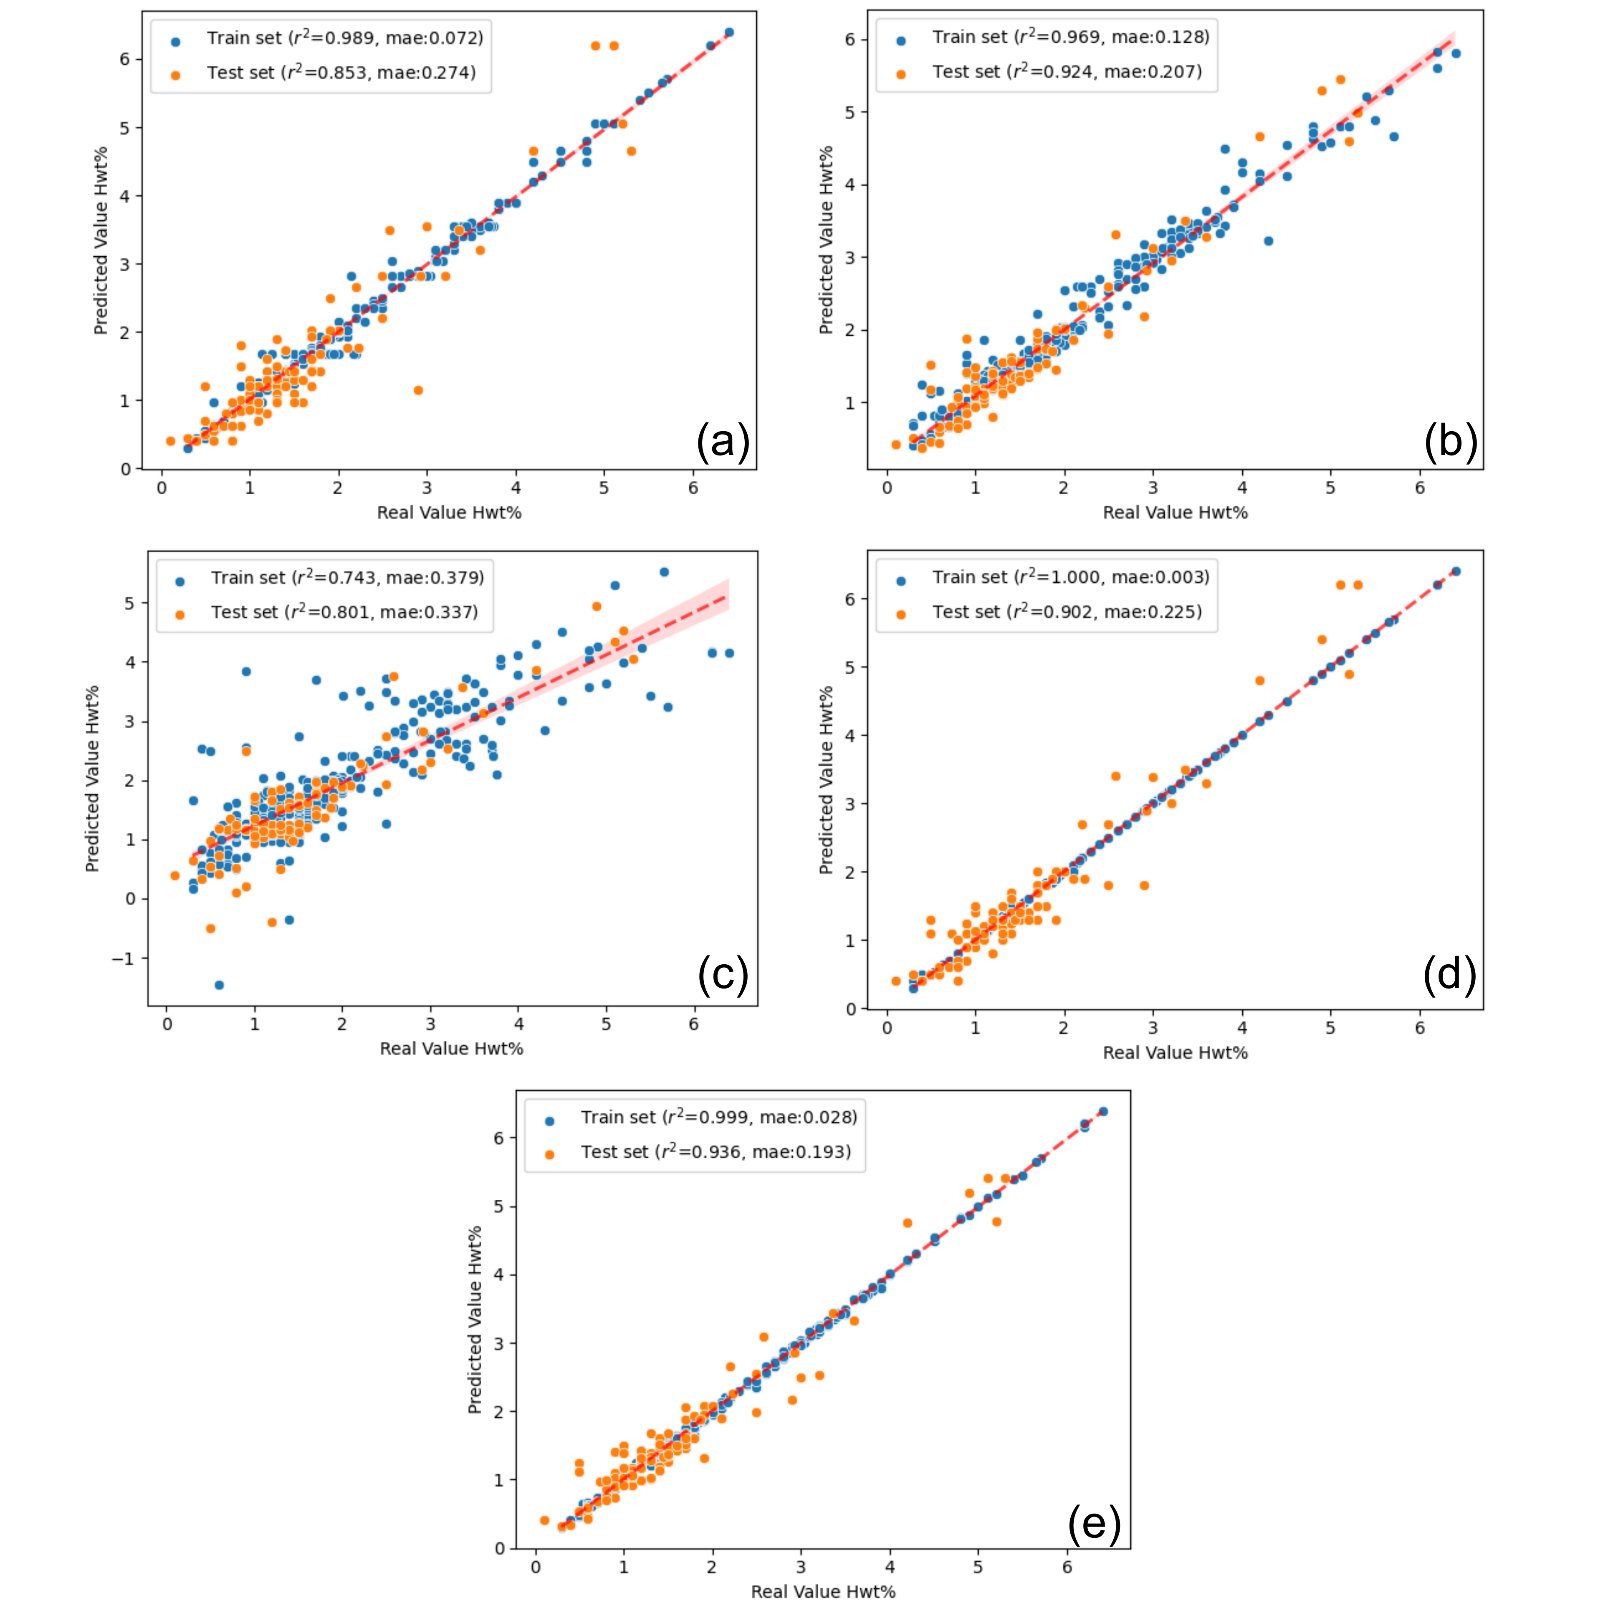
**H. Storage Predictions of Machine Learning Models M. Hydrides**

**Fig. S1** Real vs Predicted Hwt% plot for (a) Decision Tree, (b) Random Forest, (c) Linear Support Vector Regression, (d) AdaBoost, and (e) eXtreme Gradient Boost machine learning models.


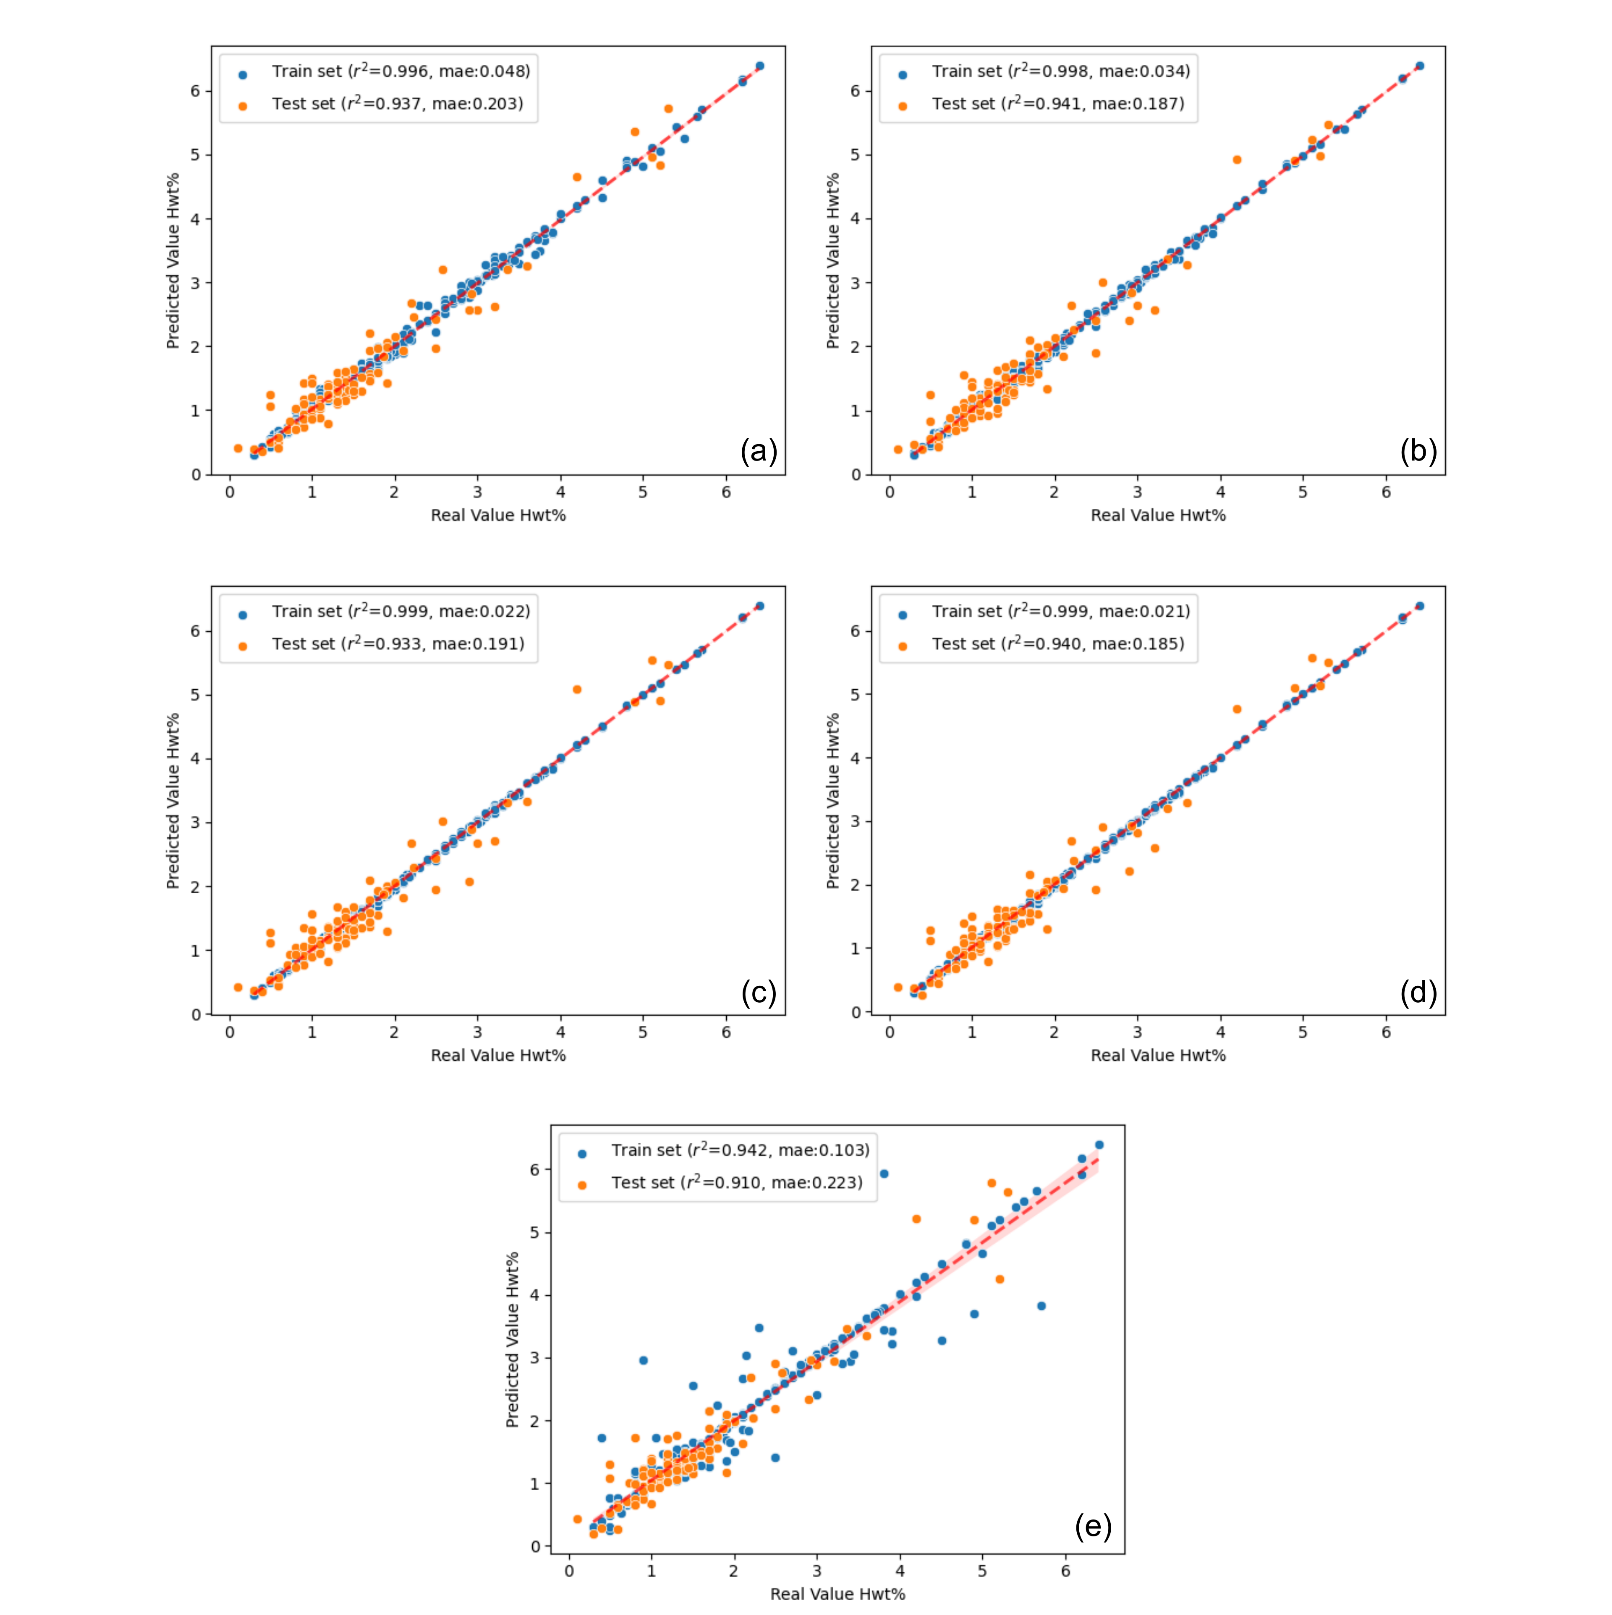
**Unsupervised Domain Adaptation Model Results**

**Fig. S2** Source accuracy testing via Unsupervised Domain Adaptation projected prediction vs real Hwt% plot on source domain using instance-based models (a) Kullback-Leibler Importance Estimation Procedure (KLIEP), (b) Unconstrained Least-Squares Importance Fitting (ULSIF), (c) Relative Unconstrained Least-Squares Importance Fitting (RULSIF), (d) Nearest Neighbors Weighting, and (e) Kernel Mean Matching.


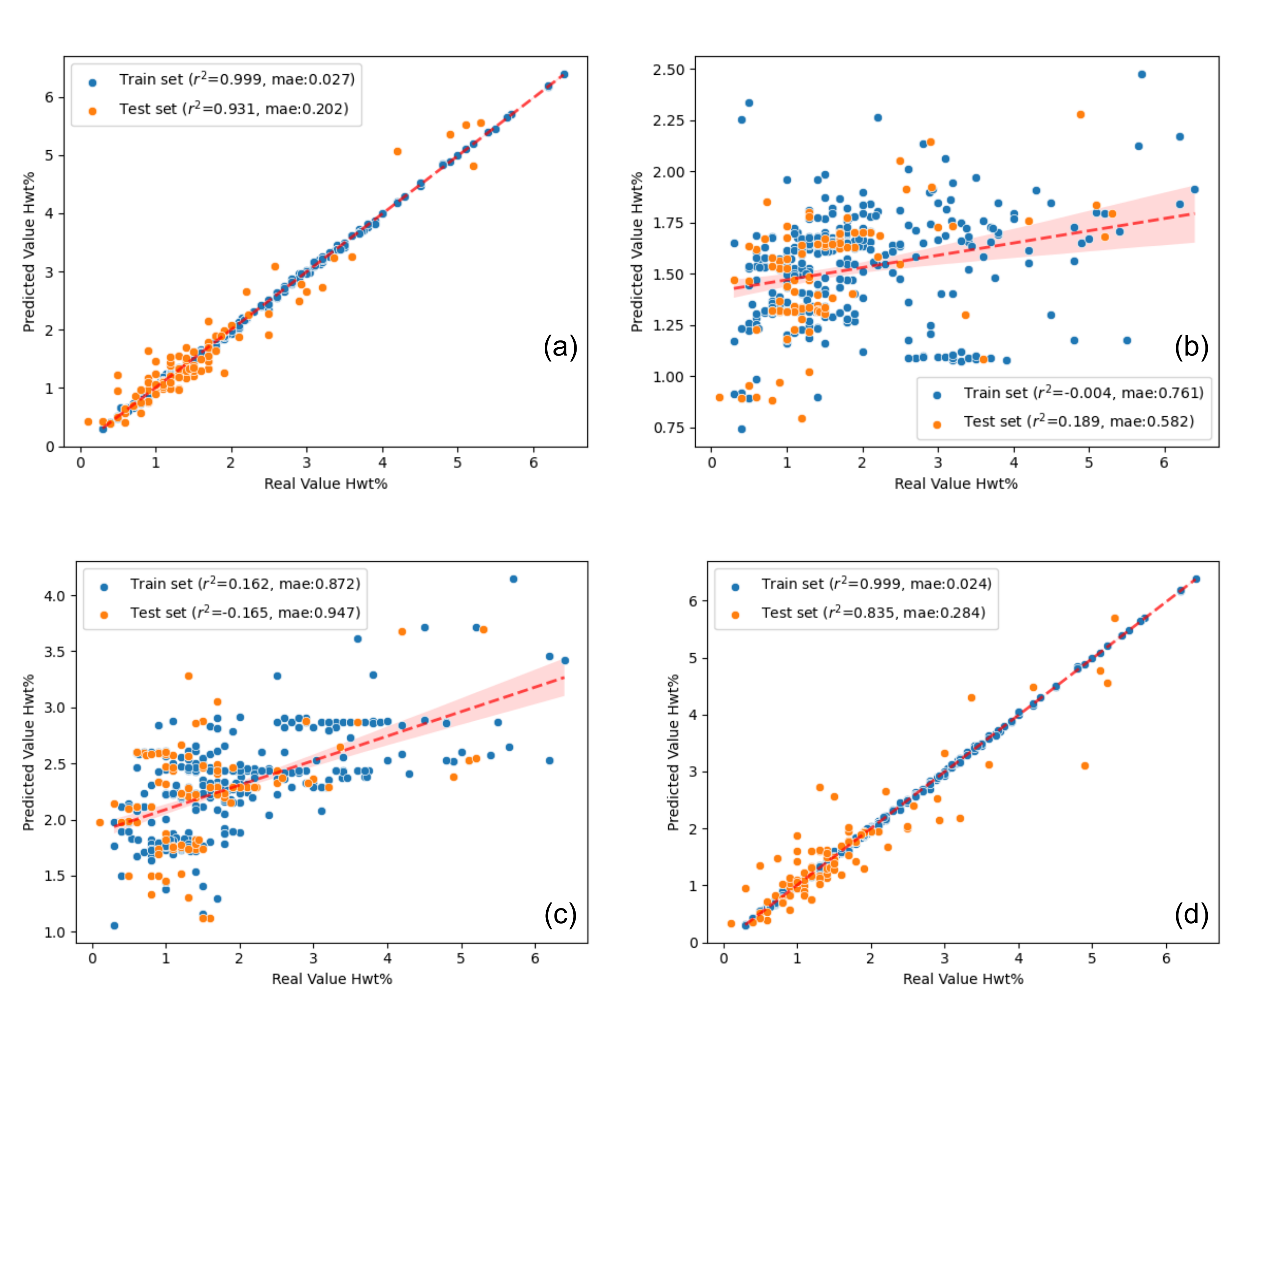


**Fig. S3** Source accuracy testing via Unsupervised Domain Adaptation projected prediction vs real Hwt% plot on source domain using feature-based models (a) feature Selection with MMD (fMMD), (b) Subspace Alignment (SA), (c) CORrelation ALignment (CORAL), and (d) Transfer Component Analysis (TCA).

**Relaxed Structures of Hydrogen Surface-adsorbed Transition Metal Oxides Ca2TiO4 and CaVO3**


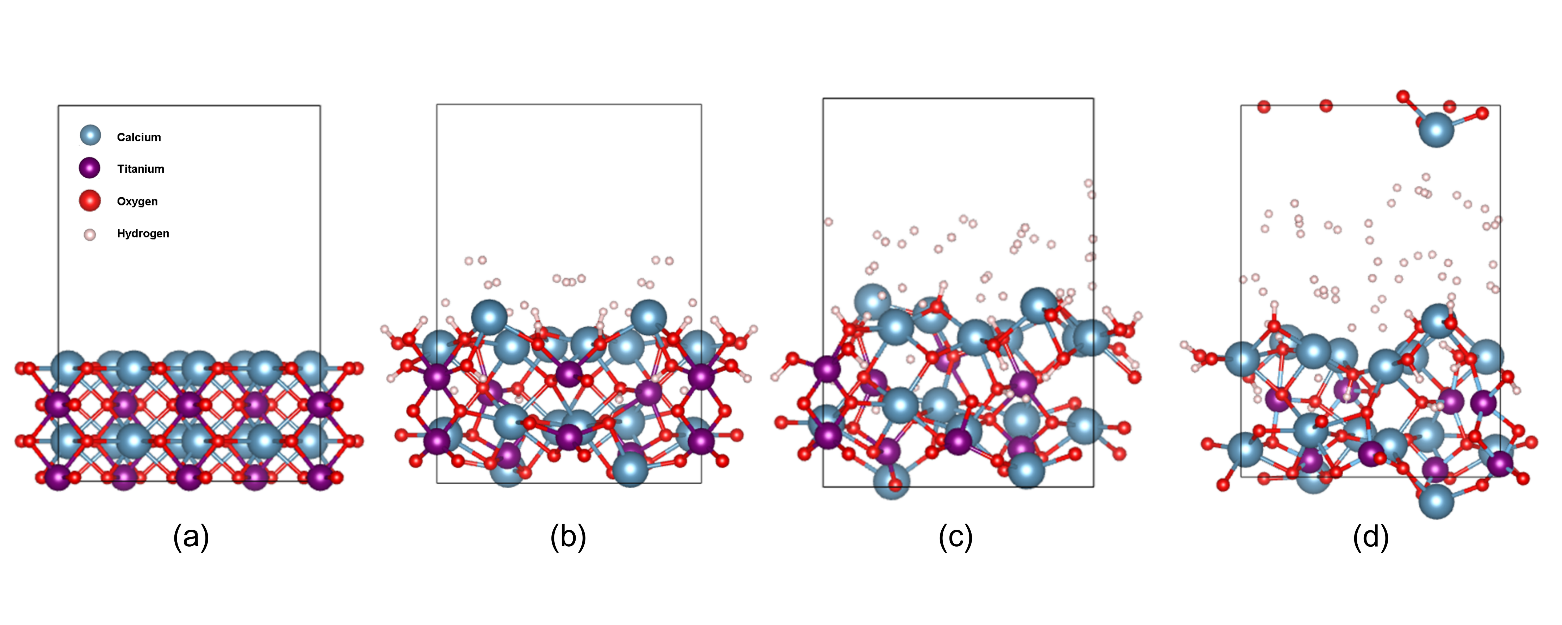


**Fig. S5** Structure configuration of fully relaxed (a) pristine CaVO3, (b) CaVO3­H3, (c) CaVO3­H6, and (d) CaVO3­H9.

**Fig. S4** Structure configuration of fully relaxed (a) pristine Ca2TiO4, (b) Ca2TiO4­H4, (c) Ca2TiO4­H6, and (d) Ca2TiO4­H8.


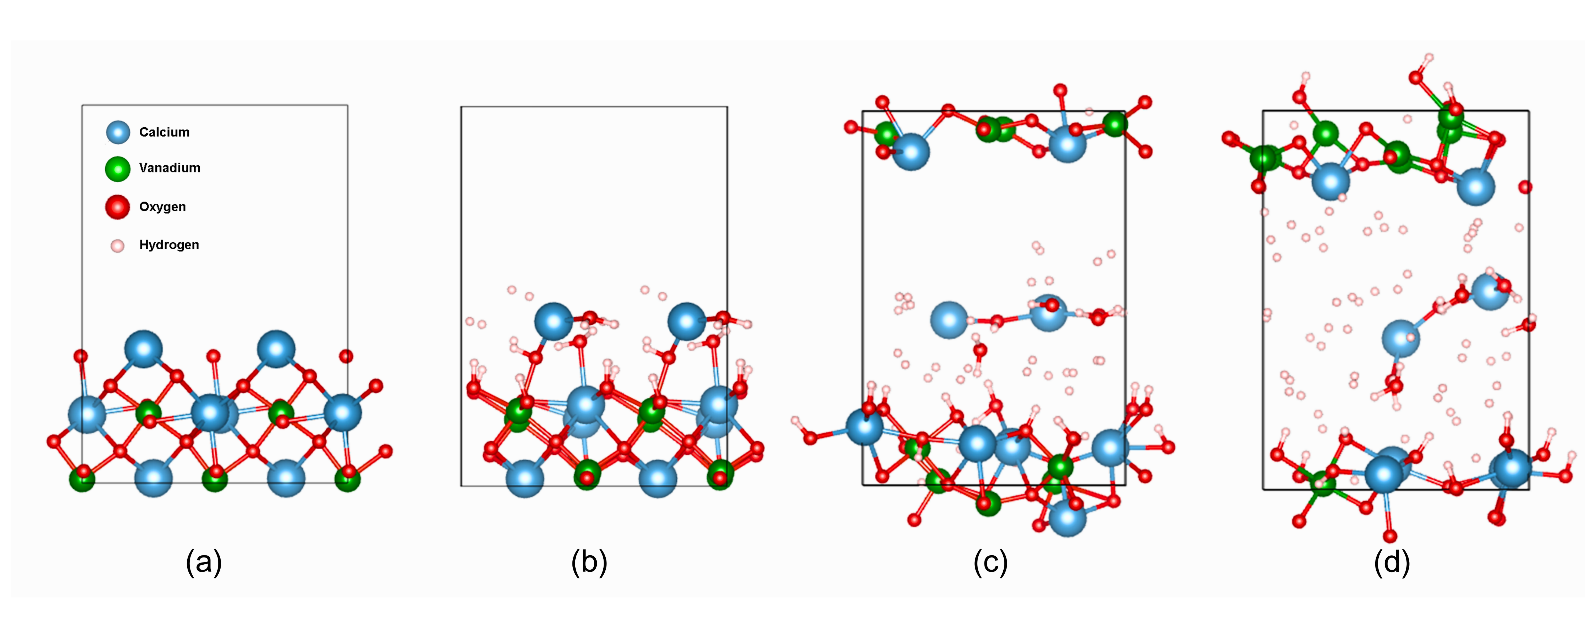


**Table S6** and d-band center (Ti) based on the pDOS calculation on the pristine and H-adsorbed Ca2TiO4

| Ca2TiO4 |  | Relative to |
| --- | --- | --- |
| Pristine | 1.7688 | 0.022 |
| Pristine + H2 | 2.5356 | -0.892 |

**Table S7** and d-band center (V) based on the pDOS calculation on the pristine and H-adsorbed CaVO3

| CaVO3 |  | Relative to |
| --- | --- | --- |
| Pristine | 1.5278 | -1.053 |
| Pristine + H2 | 2.1685 | -1.502 |
